# Supplementary material for: Addition of losartan to FOLFORINOX and chemoradiation downregulates pro-invasion and immunosuppression-associated genes in locally advanced pancreatic cancer
Source: bioRxiv or medRxiv preprint supplement (doi:10.1101/2022.06.09.22275912), 2022-06-13
Supplement: Supplementary file [file media-1.pdf]

**Supplementary Table 1.** Top 30 upregulated and 30 downregulated genes losartan+FFX+CRT vs untreated and FFX+CRT vs untreated

**Losartan+FFX+CRT vs untreated**

| <b>Gene</b> | <b>log2 Fold Change</b> | <b>Gene</b> | <b>log2 Fold Change</b> |
|-------------|-------------------------|-------------|-------------------------|
| CXCL12      | 3.107106263             | PRAME       | -2.740720505            |
| S100A12     | 3.066079227             | MS4A1       | -2.393884687            |
| PLA2G1B     | 2.844783611             | CD19        | -2.269109818            |
| IL6R        | 2.536735393             | TNFSF10     | -2.192247917            |
| CDKN1A      | 2.357279706             | CEACAM1     | -2.038986236            |
| CD36        | 2.333143978             | CRP         | -1.942508565            |
| NCAM1       | 2.216656032             | CEACAM6     | -1.931150488            |
| C7          | 2.090085519             | LTB         | -1.874620654            |
| PTGDR2      | 2.082487988             | TNFRSF13C   | -1.862462008            |
| EGR1        | 2.03652398              | MST1R       | -1.795221663            |
| TNFRSF10C   | 1.993801871             | CD22        | -1.749943938            |
| CFD         | 1.930190442             | CARD11      | -1.645795579            |
| C1S         | 1.870169584             | TIGIT       | -1.627713485            |
| A2M         | 1.82732473              | APOE        | -1.579813684            |
| C1R         | 1.79386208              | IFNL2       | -1.562969207            |
| CDH5        | 1.686105347             | C8G         | -1.486078969            |
| MRC1        | 1.67680126              | IKBKE       | -1.474634008            |
| MME         | 1.666333457             | BAGE        | -1.471209973            |
| CD209       | 1.661840481             | CXCL6       | -1.444271288            |
| IL6         | 1.628468226             | CD1A        | -1.441887561            |
| S100A8      | 1.617490827             | LILRA4      | -1.411892363            |
| MCAM        | 1.601468829             | HAMP        | -1.387331053            |
| NFATC2      | 1.597515063             | BLK         | -1.37950213             |
| CXCR2       | 1.5938512               | CARD9       | -1.353466064            |
| NFATC1      | 1.585587277             | CD79B       | -1.350584906            |
| ALCAM       | 1.583855159             | CD207       | -1.338332006            |
| CEBPB       | 1.579985577             | SPP1        | -1.30377095             |
| CCL14       | 1.568506524             | CMKLR1      | -1.28675557             |
| ITGA5       | 1.553775982             | TNFRSF13B   | -1.282425921            |
| C3          | 1.552484483             | TMEFF2      | -1.281711177            |

**FFX+CRT vs untreated**

| <b>Gene</b> | <b>log2 Fold Change</b> | <b>Gene</b> | <b>log2 Fold Change</b> |
|-------------|-------------------------|-------------|-------------------------|
| CXCL12      | 2.786385284             | CD19        | -1.59556708             |
| S100A12     | 2.39670815              | TNFSF10     | -1.588809816            |
| IL6         | 2.364961048             | PASD1       | -1.520372446            |
| CHIT1       | 2.341397779             | C8G         | -1.504489408            |
| CD36        | 2.26777669              | CD1A        | -1.502463848            |
| NCAM1       | 2.109342028             | CEACAM1     | -1.476956818            |
| CFD         | 2.071863327             | BAGE        | -1.371877113            |
| C7          | 2.009130033             | ISG15       | -1.346348912            |
| S100A8      | 1.99921441              | TNF         | -1.340331809            |
| CCL2        | 1.898207953             | SPINK5      | -1.294335679            |
| CDKN1A      | 1.811771092             | MST1R       | -1.251119707            |
| HLA-DRA     | 1.798049862             | IKBKE       | -1.203617298            |
| CD6         | 1.755758576             | CD207       | -1.201928878            |
| TNFRSF10C   | 1.746069298             | LILRA4      | -1.200529145            |
| A2M         | 1.729697292             | IL3         | -1.195641387            |
| IL6R        | 1.728099539             | IL22RA2     | -1.158804154            |
| CD209       | 1.688962235             | FOXJ1       | -1.154825736            |
| CCL11       | 1.649294657             | LTB         | -1.147464958            |
| CCL21       | 1.58581805              | TNFRSF13C   | -1.141840485            |
| C1S         | 1.573429793             | MAGEA3      | -1.137454041            |
| EGR1        | 1.548193175             | DDX58       | -1.12531104             |
| CCL18       | 1.547490033             | IFNA7       | -1.111884386            |
| CR1         | 1.534196132             | IL24        | -1.101148838            |
| HLA-DPB1    | 1.532657244             | CARD9       | -1.100616041            |
| SAA1        | 1.529826861             | IGLL1       | -1.098223435            |
| MRC1        | 1.50147795              | IL17RB      | -1.097305889            |
| C1R         | 1.472634867             | IL1A        | -1.092380557            |
| LY86        | 1.421245952             | ELANE       | -1.088190128            |
| MCAM        | 1.41836483              | IL13        | -1.07314633             |
| SELL        | 1.386822499             | TPTE        | -1.064776441            |

**Supplementary Table 2.** Gene Set Enrichment Analysis results of losartan+FFX+CRT vs FFX+CRT

| Gene Sets                                                | NES       | p-value | FDR q-value |
|----------------------------------------------------------|-----------|---------|-------------|
| GOMF DNA BINDING TRANSCRIPTION REPRESSOR ACTIVITY        | 2.03667   | 0.0     | 0.0532      |
| GOBP RHYTHMIC PROCESS                                    | 2.02573   | 0.0     | 0.0285      |
| GOCC CHROMOSOME                                          | 1.95736   | 0.0     | 0.0699      |
| GOMF DNA BINDING TRANSCRIPTION FACTOR ACTIVITY           | 1.92847   | 0.0     | 0.0769      |
| GOCC CHROMATIN                                           | 1.90216   | 0.0     | 0.0860      |
| GOBP CIRCADIARRHYTHM                                     | 1.886687  | 0.0019  | 0.0902      |
| GOMF SEQUENCE SPECIFIC DNA BINDING                       | 1.8675246 | 0.0     | 0.1027      |
| GOBP REGIONALIZATION                                     | 1.8666339 | 0.0060  | 0.0908      |
| GOBP MAMMARY GLAND DEVELOPMENT                           | 1.8660303 | 0.0     | 0.0813      |
| GOMF TRANSCRIPTION FACTOR BINDING                        | 1.8650856 | 0.0     | 0.0744      |
| GOCC TRANSCRIPTION REGULATOR COMPLEX                     | 1.859656  | 0.0     | 0.0743      |
| GOMF CIS_REGULATORY REGION SEQUENCE SPECIFIC DNA BINDING | 1.849835  | 0.0     | 0.0776      |
| GOMF TRANSCRIPTION REGULATOR ACTIVITY                    | 1.8459487 | 0.0     | 0.0749      |
| GOBP CELL AGING                                          | 1.830189  | 0.0     | 0.0866      |
| GOBP CHROMOSOME ORGANIZATION                             | 1.8002028 | 0.0041  | 0.1165      |
| GOBP RESPONSE TO UV                                      | 1.7854171 | 0.0038  | 0.1301      |
| GOBP REGULATION OF MITOCHONDRION ORGANIZATION            | 1.7661172 | 0.0065  | 0.1520      |
| GOBP MITOTIC CELL CYCLE PHASE TRANSITION                 | 1.7641045 | 0.0060  | 0.1467      |
| GOCC NUCLEOLUS                                           | 1.7618381 | 0.0039  | 0.1428      |
| GOBP HEAD DEVELOPMENT                                    | 1.7540505 | 0.0120  | 0.1483      |
| GOBP REGULATION OF AUTOPHAGY                             | 1.7434623 | 0.0060  | 0.1279      |
| GOBP RESPONSE TO RADIATION                               | 1.6620013 | 0.0099  | 0.1717      |

**Supplementary Table 3.** DEGs losartan+FFX+CRT vs untreated and FFX+CRT vs untreated  
Losartan+FFX+CRT vs untreated

| Gene  | baseMean   | log2FoldChange | lfcSE      | stat       | p value    | p adjusted |
|-------|------------|----------------|------------|------------|------------|------------|
| IFNG  | 29.6420596 | -0.744415402   | 0.29152165 | -2.553551  | 0.01066307 | 0.02904492 |
| IL12A | 32.5976109 | -0.939543934   | 0.2645517  | -3.5514568 | 0.0003831  | 0.00190454 |
| IL4   | 20.7170759 | -0.927080453   | 0.34959378 | -2.6518791 | 0.00800452 | 0.0231877  |
| IL13  | 24.1710259 | -1.063508348   | 0.40282009 | -2.6401572 | 0.00828676 | 0.02391041 |
| IL23A | 34.9089588 | -0.874108434   | 0.29462679 | -2.9668329 | 0.00300884 | 0.0104097  |
| CD1A  | 28.2896857 | -1.441887561   | 0.40173532 | -3.5891481 | 0.00033176 | 0.00170553 |

FFX+CRT vs untreated

| Gene  | baseMean   | log2FoldChange | lfcSE      | stat       | p value    | p adjusted |
|-------|------------|----------------|------------|------------|------------|------------|
| IFNG  | 29.6420596 | -0.758509704   | 0.28363786 | -2.6742189 | 0.00749036 | 0.02641526 |
| IL12A | 32.5976109 | -0.643382038   | 0.25519082 | -2.5211802 | 0.01169619 | 0.03811706 |
| IL4   | 20.7170759 | -0.941091626   | 0.34002277 | -2.7677312 | 0.0056448  | 0.021462   |
| IL13  | 24.1710259 | -1.07314633    | 0.39240174 | -2.7348154 | 0.00624153 | 0.02301169 |
| IL23A | 34.9089588 | -1.048044697   | 0.28768372 | -3.6430448 | 0.00026943 | 0.00202768 |
| CD1A  | 28.2896857 | -1.502463848   | 0.39163159 | -3.8364215 | 0.00012484 | 0.00109799 |
| CCL21 | 697.045661 | 1.58581805     | 0.50631624 | 3.13207031 | 0.00173578 | 0.00892339 |

**Supplementary Table 4.** Genes included in panels B and C of Figure 3

**Dendritic cells**

CCR7

CD40LG

FT3LG

**TCR-CD3 complex**

ZAP70

CD3E

CD247

CD3D

LCK

ITK

**T cell activation & cytolytic activity**

CD5

SPN

NFATC4

IL16

GZMM

**Innate & adaptive immune response**

SH2D1A

SLAMF6

LY9

TLR9

**Inflammatory mediators**

LTB

IL11RA

CR2

**B cells**

BLK

MS4A1

CD79B

TNFRSF13B

TNFRSF13C

POU2F2

**Supplementary Table 5.** Genes included in panels C and D of Figure 4

**Tumor Suppressors**

RORA

CYLD

FEZ1

**Blood vessels**

NFATC4\*

AKT3

PECAM1

CDH5

JAM3

**Dendritic cells**

IL3RA

FLT3LG

CSF1

**MHCII**

HLA-DRB3

LAMP2

**T cell activation**

STAT4

CD6

TNFSF8

**Inflammation Inhibition**

NCF4

SERPING1

NFKBIA

A2M

**Epithelial**

EPCAM

CDH1

**Supplementary Table 6.** Losartan+FFX+CRT correlation of individual genes with overall survival

| <b>Positive correlation</b> |                             | <b>Negative correlation</b> |                             |
|-----------------------------|-----------------------------|-----------------------------|-----------------------------|
| <b>Gene</b>                 | <b>Spearman correlation</b> | <b>Gene</b>                 | <b>Spearman correlation</b> |
| NFATC4                      | 0.5                         | GNLY                        | -0.67                       |
| ENTPD1                      | 0.5                         | F12                         | -0.6                        |
| IL3RA                       | 0.5                         | TTK                         | -0.59                       |
| ELK1                        | 0.5                         | LYN                         | -0.59                       |
| CDKN1A                      | 0.5                         | SYK                         | -0.58                       |
| CSF1                        | 0.5                         | BTLA                        | -0.56                       |
| SERPING1                    | 0.5                         | ITGA6                       | -0.56                       |
| S100B                       | 0.5                         | IL15RA                      | -0.55                       |
| STAT3                       | 0.6                         | PBK                         | -0.54                       |
| FOS                         | 0.6                         | IL12RB2                     | -0.54                       |
| STAT2                       | 0.6                         | IDO1                        | -0.54                       |
| RORA                        | 0.6                         | LGALS3                      | -0.54                       |
| GTF3C1                      | 0.6                         | CCR3                        | -0.53                       |
| THY1                        | 0.6                         | EPCAM                       | -0.53                       |
| BCL2                        | 0.6                         | F2RL1                       | -0.53                       |
| PPBP                        | 0.6                         | CASP1                       | -0.52                       |
| CFI                         | 0.6                         | TNFSF15                     | -0.51                       |
| CD63                        | 0.6                         | CDH1                        | -0.5                        |
| EGR1                        | 0.6                         |                             |                             |
| MAPK11                      | 0.6                         |                             |                             |
| CD34                        | 0.6                         |                             |                             |
| CD99                        | 0.6                         |                             |                             |
| CD200                       | 0.6                         |                             |                             |
| TNFSF12                     | 0.6                         |                             |                             |
| AKT3                        | 0.7                         |                             |                             |
| ENG                         | 0.7                         |                             |                             |
| UBC                         | 0.7                         |                             |                             |
| PNMA1                       | 0.7                         |                             |                             |
| FEZ1                        | 0.8                         |                             |                             |
| JAM3                        | 0.8                         |                             |                             |

**Supplementary Table 7. FFX+CRT correlation of individual genes with overall survival**

| <b>Positive correlation</b> |                             | <b>Negative correlation</b> |                             |
|-----------------------------|-----------------------------|-----------------------------|-----------------------------|
| <b>Gene</b>                 | <b>Spearman correlation</b> | <b>Gene</b>                 | <b>Spearman correlation</b> |
| CXCL12                      | 0.5                         | TNFRSF4                     | -0.75                       |
| POU2AF1                     | 0.5                         | SERPINB2                    | -0.65                       |
| CD1C                        | 0.5                         | HSD11B1                     | -0.64                       |
| BTLA                        | 0.5                         | RIPK2                       | -0.58                       |
| PAX5                        | 0.51                        | ITGB1                       | -0.57                       |
| XCR1                        | 0.51                        | CXCL1                       | -0.56                       |
| CD209                       | 0.52                        | CD274                       | -0.55                       |
| BLNK                        | 0.52                        | BID                         | -0.54                       |
| PTGDR2                      | 0.53                        | TAP1                        | -0.52                       |
| POU2F2                      | 0.57                        | USP9Y                       | -0.51                       |
| ECSIT                       | 0.57                        | IRF1                        | -0.5                        |
| IRF4                        | 0.57                        | HLA-E                       | -0.49                       |
| ADORA2A                     | 0.6                         | BATF                        | -0.49                       |
| FLT3                        | 0.6                         |                             |                             |
| TIRAP                       | 0.65                        |                             |                             |
| CD1E                        | 0.68                        |                             |                             |



**Supplementary Table 8: Gene grouping association with overall survival**

| Gene Sets                                                                                                                                                                      | p value* |
|--------------------------------------------------------------------------------------------------------------------------------------------------------------------------------|----------|
| <b>Losartan+FFX+CRT: negative correlation</b>                                                                                                                                  |          |
| F12 TTK LYN SYK BTLA ITGA6 IL15RA PBK IDO1 LGALS3<br>CCR3 EPCAM F2RL1 CASP1 TNFSF15 CDH1 IL12RB GNLY                                                                           | < 0.0001 |
| BTLA IDO1 LGALS3 EPCAM PBK ITGA6 TTK                                                                                                                                           | 0.0006   |
| TTK PBK EPCAM ITGA6                                                                                                                                                            | 0.0022   |
| IDO1 LGALS3 BTLA                                                                                                                                                               | 0.0042   |
| <b>Losartan+FFX+CRT: positive correlation</b>                                                                                                                                  |          |
| ENG CD200 JAM3 FEZ1 EGR1 RORA IL3RA CSF1 NFATC4 PNMA1<br>UBC AKT3 TNFSF12 CD99 CD34 MAPK11 CD63 CFI PPBP BCL2 THY1<br>GTF3C1 STAT2 STAT3 FOS S100B SERPING1 CDKN1A ELK1 ENTPD1 | 0.0538   |
| ENG JAM3 CD99 EGR1 RORA IL3RA CSF1 PNMA1 AKT3<br>MAPK11 GTF3C1 FOS CDKN1A ELK1 PPBP                                                                                            | 0.0138   |
| <b>FFX+CRT: negative correlation</b>                                                                                                                                           |          |
| TNFRSF4 SERPINB2 HSD11B1 RIPK2 ITGB1 CXCL1<br>CD274 BID TAP1 USP9Y IRF1 HLA-E BATF                                                                                             | 0.0417   |
| BID TAP1 USP9Y IRF1 HLA-E BATF HSD11B1 RIPK2 CXCL1                                                                                                                             | 0.0043   |
| BID USP9Y BATF HSD11B1                                                                                                                                                         | 0.0004   |
| <b>FFX+CRT: positive correlation</b>                                                                                                                                           |          |
| CD1E TIRAP FLT3 ADORA2A IRF4 ECSIT POU2F2 PTGDR2 BLNK<br>PAX5 BTLA POU2AF1 CXCL12 CD1C CD209 XCR1                                                                              | 0.038    |
| CD209 CD1C FLT3 BTLA IRF4 CD1E ECSIT TIRAP CXCL12                                                                                                                              | 0.0074   |
| CD209 CD1C FLT3                                                                                                                                                                | 0.0014   |
| CD209 CD1C                                                                                                                                                                     | 0.0006   |

\* Overall survival cutoff: 36 M

**Supplementary Table 9.** Gene signature association with overall survival

| <b>Gene Sets</b>                | <b>p value*</b> | <b>p value**</b> |
|---------------------------------|-----------------|------------------|
| CCL13 CCL17 CCL22 HSD11B1 CD209 | 0.7291          | 0.0523           |
| CCL13 CCL17 CCL22 CD209         | 0.6032          | 0.0013           |

\* Losartan+FFX+CRT OS cutoff 36 M

\*\* FFX+CRT OS cutoff 36 M

## Supplementary Figure 1

More genes are commonly expressed between Losartan+FFX+CRT and FFX+CRT

Losartan+FFX+CRT

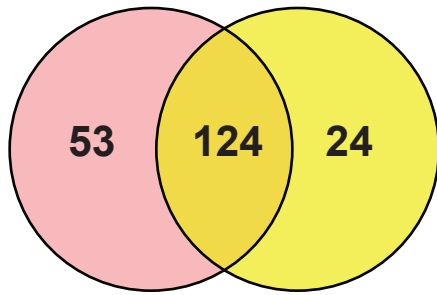

FFX+CRT

Losartan+FFX+CRT

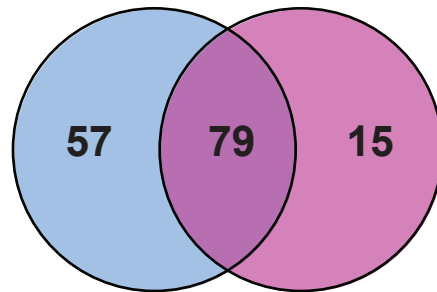

FFX+CRT

Supplementary Figure 2

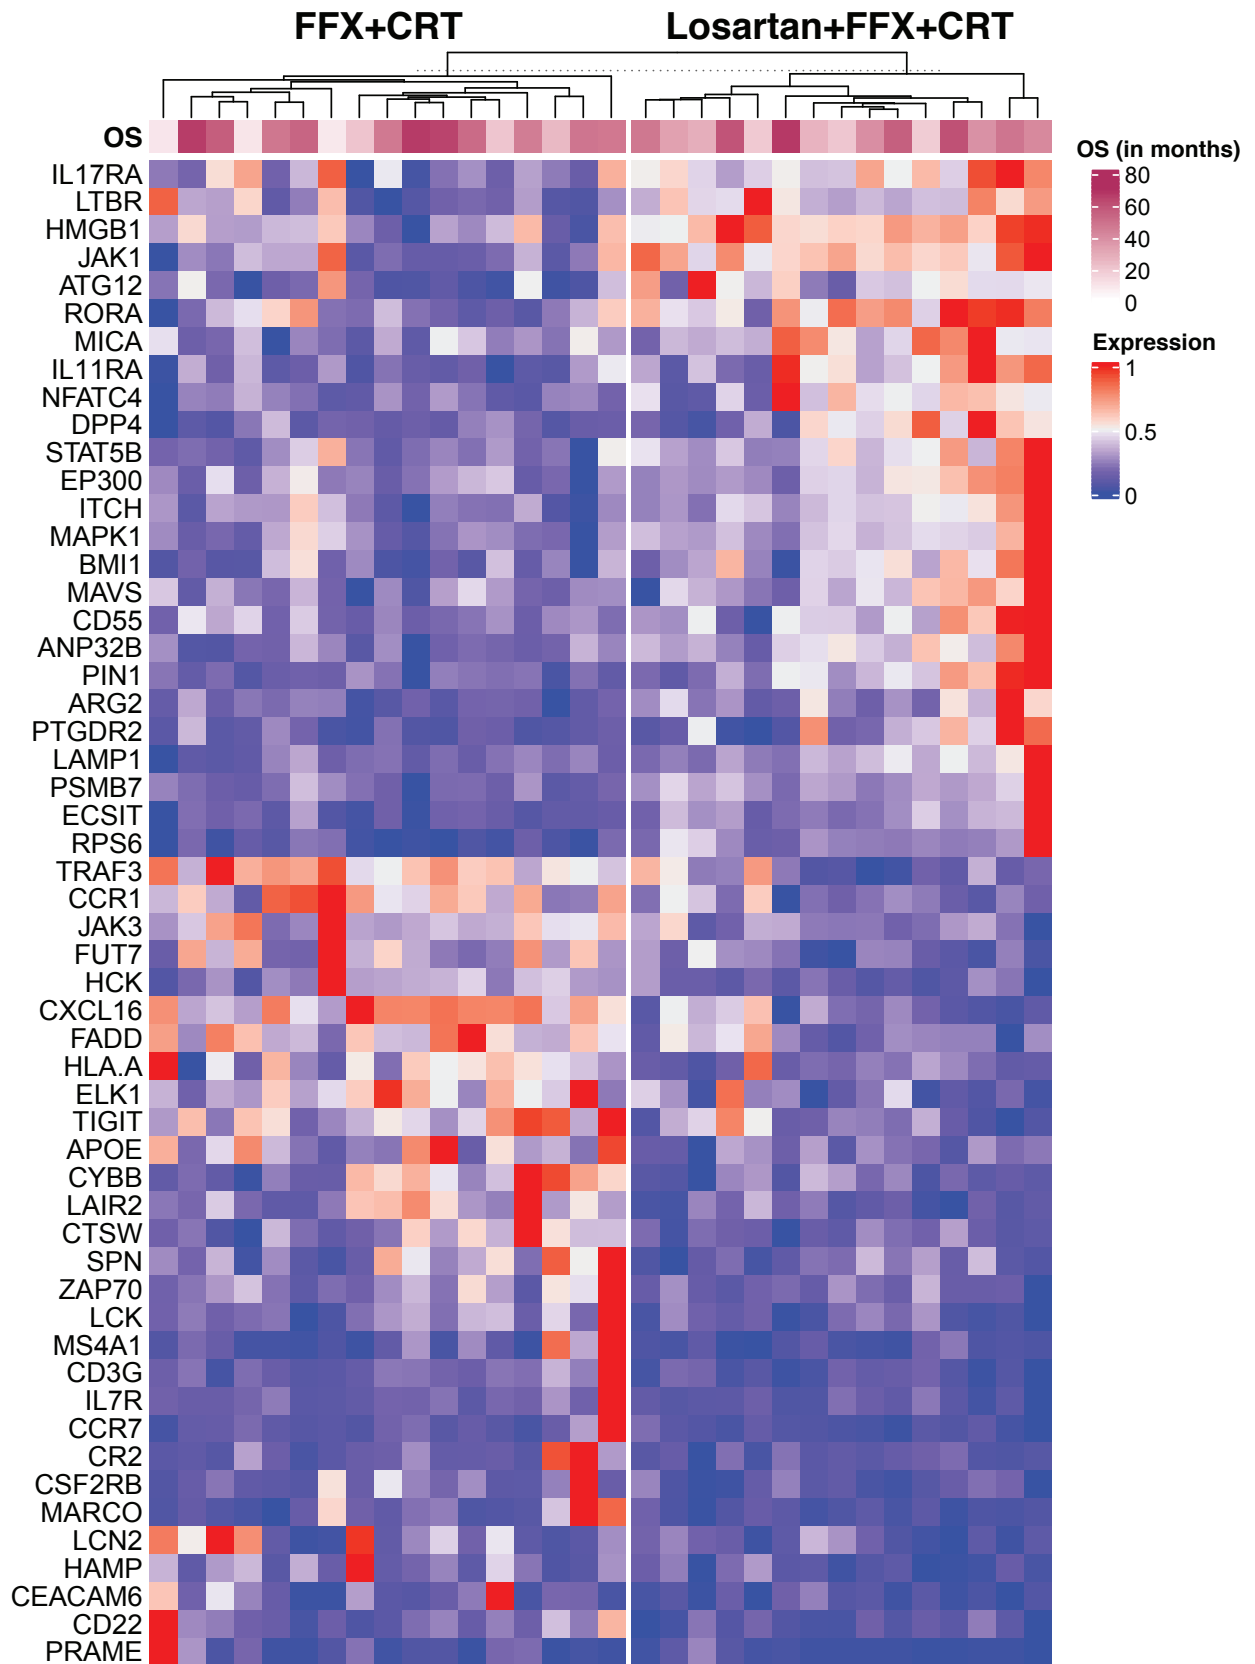

# Supplementary Figure 3

**A**

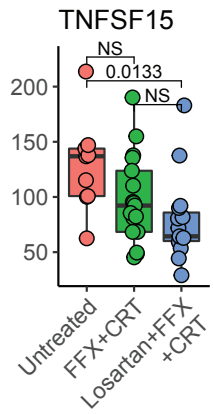

**B**

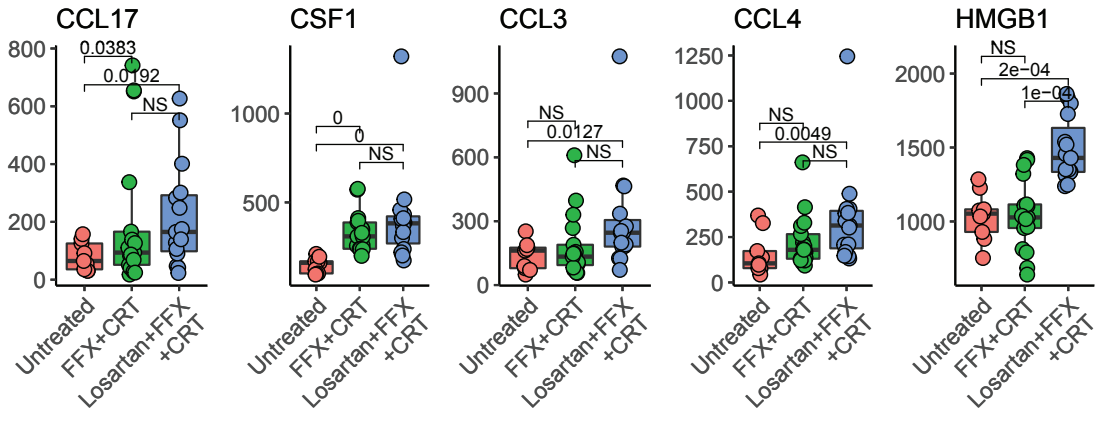

# Supplementary Figure 4

## FFX-CRT

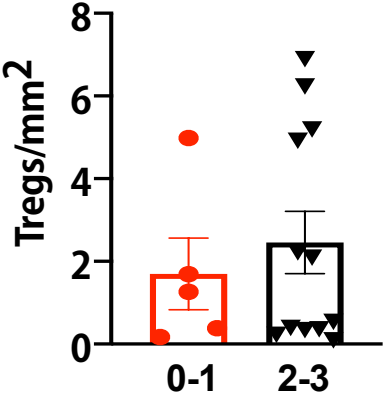

- 0-1: Complete Response/Near Complete
- ▼ 2-3: Partial/Poor or No Response
